# Supplementary material for: Pacing and perceived exertion in endurance performance in exercise therapy and health sports
Source: Springer Nature journal article supplement (doi:10.1007/s12662-017-0489-5), 2018-01-15
Supplement: 12662_2017_489_MOESM1_ESM.pdf [file 12662_2017_489_MOESM1_ESM.pdf]

**Pacing und Beanspruchungsempfinden bei Ausdauerbelastungen in Bewegungstherapie  
und Gesundheitssport: Eine kompetenzorientierte Betrachtung**

Deutschsprachige Version als Online-Zusatzmaterial zum Beitrag

*Pacing and perceived exertion in endurance performance in exercise therapy and health  
sports: A competence-oriented view*

**Christian Thiel<sup>1</sup>, Klaus Pfeifer<sup>2</sup> & Gorden Sudeck<sup>3</sup>**

<sup>1</sup> University of Applied Sciences Bochum, Department of Applied Health Sciences

<sup>2</sup> University of Erlangen-Nuremberg, Institute of Sport Science and Sport

<sup>3</sup> University of Tübingen, Institute of Sport Science

**Corresponding address:**

Prof. Dr. Christian Thiel  
University of Applied Sciences Bochum  
Department of Applied Health Sciences  
Physiotherapy studies  
Gesundheitscampus 6-8  
44801 Bochum  
phone: +49 234-77727 628  
fax: +49 234-77727 828  
e-mail: [christian.thiel@hs-gesundheit.de](mailto:christian.thiel@hs-gesundheit.de)

**Conflicts of interest**

The authors declare that they have no conflict of interest.

## **Zusammenfassung**

Wenn Menschen über längere Zeit körperlich aktiv sind, regulieren sie ihre körperliche Leistung, um das intendierte Ziel der Aktivität mit einem individuell angemessenen Aufwand zu erreichen. Diese auf einen Endpunkt bezogene Einteilung energetischer Reserven wird „Pacing“ genannt und läuft - bewusst oder unterbewusst - permanent ab. Wenngleich es vor allem im ausdauersportlichen Wettkampf Beachtung findet, spielt Pacing auch in anderen Kontexten der körperlichen Aktivität, darunter Fortbewegung/Transport, Arbeit, Freizeit, und Prävention/Rehabilitation, eine wichtige Rolle.

Der vorliegende Beitrag behandelt einige Grundlagen zum Pacing und möchte eine Diskussion anregen, indem Potenzial und Limitationen einer stärkeren Berücksichtigung von Pacing in Gesundheitssport und Bewegungstherapie aus biomedizinischer und psychosozialer Perspektive beleuchtet werden. Ausdauertraining, welches das Erlernen von Pacing und die Wahrnehmung von Beanspruchung fokussiert, kann die Steuerungskompetenz als Komponente der bewegungsbezogenen Gesundheitskompetenz verbessern. Dies würde im Sinne der Patienten- bzw. Klientenorientierung die Autonomie bei der Belastungsgestaltung stärken, und könnte Wohlbefinden, Eigenverantwortung, Compliance und langfristige Trainingseffekte günstig beeinflussen.

Tatsächlich sehen Fachgesellschaften mittlerweile Spielräume für definierte Zielgruppen in der kardialen Prävention und Rehabilitation, die Trainingsintensität anhand des Anstrengungsempfindens selbst zu steuern. Welche Trainingseffekte und Risiken diese Selbststeuerung für Menschen ohne Trainingserfahrung mit sich bringt, müsste allerdings noch sorgfältiger untersucht werden. Forschungsbedarf besteht auch zu Mechanismen der Wahrnehmung von Beanspruchung und Anstrengung, und hinsichtlich möglicher Ansätze zur optimalen Unterstützung des Erlernens von Pacing zur Erlangung von Steuerungskompetenz.

## **Schlüsselwörter**

Ausdauertraining, Anstrengungsempfinden, selbstgesteuertes Training, bewegungsbezogene Gesundheitskompetenz

## Einführung

Wenn sich Menschen über eine längere Strecke aus eigener Kraft fortbewegen, dann wählen sie eine Geschwindigkeit, die es Ihnen ermöglicht mit einem selbst gewählten Grad an Beanspruchung und ohne Gefährdung des Organismus die mit der Fortbewegung intendierten Ziele zu erreichen. Diese Regulation der Leistung wird allgemein Pacing genannt.

Pacing erfordert die Integration von Antizipation (Feed-Forward) und physiologischen Signalen (Feedback). Sie wird besonders im Ausdauersport deutlich, wenn Athleten ihre metabolische Beanspruchung erfahrungsbasiert und situationsbedingt auf zeitliche oder räumliche Ziele abstimmen (Ulmer, 1996). Pacing spielt aber auch bei körperlicher Aktivität in Alltag, Prävention und Rehabilitation eine wichtige Rolle (Edwards & Polman, 2013; Smits, Pepping, & Hettinga, 2014).

Der Begriff „Pacing“ wird unterschiedlich ausgelegt, wie die folgenden Paraphrasen aus Übersichtsarbeiten verdeutlichen. Pacing ist demnach...

- ...in seiner ursprünglichen Verwendung im ausdauerorientierten Wettkampfsport die effiziente Nutzung energetischer Ressourcen während eines Wettkampfes, so dass alle verfügbaren Energiespeicher kurz vor dem Ziel aufgebraucht sind, ohne dass eine bedeutende Geschwindigkeitsreduktion auftritt (Roelands, de Koning, Foster, Hettinga, & Meeusen, 2013).
- ...in erweiterten Anwendungskontexten das zielgerichtete Management der Leistung und Anstrengung im Verlauf einer länger andauernden körperlichen Tätigkeit. Pacing ist eine Strategie von Individuen – seien sie hochaktiv oder körperlich inaktiv – körperliche und mentale Leistung und Anstrengung mit Bezug auf ein spezifisches Ziel und unter Kenntnis der vermutlichen Anforderungen der Aufgabe zu managen (Edwards & Polman, 2013).
- ... unabhängig vom Anwendungskontext der verhaltensbezogene Ausdruck eines kontinuierlich ablaufenden Entscheidungsprozesses bei der Regulation körperlicher Leistung (Smits et al., 2014).

Der Begriff Pacing bezieht sich auf den Vorgang zielorientierten menschlichen Ressourcenmanagements bei körperlicher Aktivität (inklusive der Mechanismen und

Organisation der Leistungsregulation) (Edwards & Polman, 2013; Smits et al., 2014; St Clair Gibson et al., 2013), sowie auf das Ergebnis dieses Managements, nämlich einem Profil der Intensität menschlicher Arbeit (d.h., körperlicher Aktivität) über die Zeit (Abbiss & Laursen, 2008). Dieses Intensitätsprofil bezieht sich in der Regel auf die Fortbewegungsgeschwindigkeit (Abbiss & Laursen, 2008; March, Vanderburgh, Titlebaum, & Hoops, 2011; Tucker, Lambert, & Noakes, 2006), zum Teil jedoch auch auf die erbrachte mechanische, physiologische oder volitionale Leistung (Bernard et al., 2009; Edwards & Polman, 2013; Le Meur et al., 2009; St Clair Gibson et al., 2013). Pacing im Ausdauerport kann durch eine Vielzahl von Faktoren beeinflusst werden, darunter Wettkampfdauer (Abbiss & Laursen, 2008) und -format (Thiel, Foster, Banzer, & de Koning, 2012), Emotionen und affektive Reaktion (Baron, Moullan, Deruelle, & Noakes, 2011), Täuschung und falsche Rückmeldung (Jones et al., 2013), aber auch Leistungsniveau, Alter und Geschlecht der Athleten sowie Umgebungsbedingungen (Thiel, de Koning, & Foster, 2015).

Aus dem Leistungssport kommt der Begriff der Pacing-Strategie, als wiederkehrende, charakteristische sportart- und disziplinspezifische Muster der Verteilung energetischer Ressourcen über die Wettkampfdauer, dargestellt über den zeitlichen Verlauf von Geschwindigkeit oder Leistung (Abbiss & Laursen, 2008). Relevant für einen breiteren Anwendungskontext sind vor allem positive (dosierte Reduktion der Leistung im Verlauf der körperlichen Belastung), gleichförmige, negative (dosierte Steigerung der Leistung im Verlauf körperlicher Belastung), und variable Pacing-Strategien (Schwankungen der Leistungen ohne unmittelbar erkennbares Muster, die jedoch auf planvolle Orientierung am Gegner, dem eigenen Befinden, und variierenden Umgebungsbedingungen zurückgehen können).

Aktualität und Relevanz des Themas „Pacing“ lassen sich an einer steigenden Zahl internationaler Publikationen zu Pacing im Leistungssport ablesen. Pacing bei körperlicher Aktivität in Alltag, Prävention und Rehabilitation findet bislang jedoch seltener Berücksichtigung in der nationalen und internationalen Literatur.

Pacing lässt sich in allen Kontexten beobachten, in denen Ausdauerbelastungen auftreten (Edwards & Polman, 2013; Smits et al., 2014), darunter Fortbewegung/Transport, Arbeit (Ulmer, 1996), Freizeit, und Gesundheit (Ekkekakis, 2009). Die Leistungsregulation erfolgt mit Blick auf eine Aufwand-Nutzen-Relation (Investition: energetischer Aufwand, körperliche Ermüdung und wahrgenommene Risiken; Ertrag: Chance der Erreichung intendierter Ziele

und Effekte). In Kontexten außerhalb des Leistungssports geht es aber in der Regel nicht darum, die Fortbewegungsgeschwindigkeit und Ausschöpfung körperlicher Ressourcen zu maximieren, sondern eine individuell adäquate Geschwindigkeit und Beanspruchung zu finden.

Die vorausschauende Regulation körperlicher Leistung spielt für eine 65-jährige mit COPD, die ihre Einkäufe über eine längere Wegstrecke in ihre Wohnung im vierten Stock transportiert (Castro et al., 2013), ebenso eine Rolle, wie für einen übergewichtigen Facharbeiter, der bei hohen Außentemperaturen ganztägig mit schwerem Gerät hantiert, oder einen Patienten mit Multipler Sklerose beim 6-Minuten Gehstest (Burschka et al., 2012). Allen genannten Aufgaben ist gemein, dass sie bei üblicher Ausführung unter den gegebenen Bedingungen bei den genannten Individuen eine substantielle kardiorespiratorisch-metabolische oder neuromuskuläre Beanspruchung induzieren, die bei fehlender Regulation potenziell die Gesundheit gefährden, starkes körperliches Missempfinden hervorrufen (Ekkekakis, Parfitt, & Petruzzello, 2011), und/oder aufgrund von Ermüdung die weitere Erfüllung der Aufgabe bzw. die Erfüllung nachfolgender Aufgaben verlangsamen oder anderweitig beeinträchtigen könnte.

Demnach enthalten auch Ausdauerbelastungen in der Prävention (Gesundheitssport) und Rehabilitation (Bewegungstherapie) die Anforderung, Pacing betreiben zu müssen. Die Förderung eines adäquaten Pacing in Gesundheitssport und Bewegungstherapie steht somit im Einklang mit Forderungen nach einer verstärkten Kompetenzorientierung in diesen Anwendungsfeldern (Sudeck & Pfeifer, 2016), die auch von Versicherern vorgebracht wird (Deutsche Rentenversicherung, 2016), und bietet Möglichkeiten der Befähigung und Stärkung der Autonomie im Sinne der Patienten- bzw. Klientenorientierung.

Vor diesem Hintergrund will der vorliegende Beitrag eine Diskussion über die Rolle von Pacing im Kontext von Ausdauerbelastungen in Gesundheitssport und Bewegungstherapie initiieren. Auf Basis einer einführenden Darstellung von Pacing in Relation zu Ermüdung und Anstrengungsempfinden wird ein Anwendungsbeispiel betrachtet, in dem Pacing in der kardialen Prävention und Rehabilitation zur Optimierung von Gesundheitseffekten und Risikominimierung reflektiert wird. Anschließend wird der Zusammenhang zwischen Pacing, Anstrengungsempfinden und Befinden erläutert sowie Einflussfaktoren und Ansätze des Kompetenzerwerbs dargestellt. Abschließend werden Anwendungspotenzial und Forschungsbedarf skizziert.

## **Ermüdung und Anstrengungsempfinden als Basis für Pacing**

Wahrnehmungen von Ermüdung und von Anstrengung spielen eine wichtige Rolle bei ausdauerorientierter körperlicher Aktivität und körperlichem Training. Muskuläre Ermüdung ist die belastungsbedingt reduzierte Fähigkeit eines Muskels, Kraft oder Leistung zu entwickeln – unabhängig davon, ob die momentan ausgeführte Bewegungsaufgabe fortgeführt werden kann oder nicht (Enoka & Duchateau, 2008). Im ermüdeten Zustand kann eine höhere subjektive Anstrengung nötig sein, um die gleiche Leistung zu erbringen (Davis & Bailey, 1997).

Die supraspinale Wahrnehmung und Bewertung von Ermüdung ermöglicht bei Berücksichtigung der verbleibenden körperlichen Arbeit (Antizipation eines Endpunktes der Bewegungsaufgabe) und der Umgebungsbedingungen eine vorausschauende Dosierung der aktuellen Leistung (Knicker, Renshaw, Oldham, & Cairns, 2011; Weir, Beck, Cramer, & Housh, 2006) und verhindert eine übermäßige periphere Ermüdung. Ermüdungsbezogene Sinneseindrücke werden wiederholt herangezogen, um den Einfluss der momentanen Belastungsintensität auf die künftige Leistungsfähigkeit abzuschätzen und die Intensität nötigenfalls anzupassen (St Clair Gibson et al., 2006).

Nach Borg kann die Summe der situationsbedingt relevanten peripheren Ermüdungssignale zusammen mit Wahrnehmungen der körperlichen Beanspruchung und des Einsatzes als Anstrengungsempfinden (Rating of Perceived Exertion, RPE) verbalisiert und gemessen werden (Borg, 1970). Befunde aus dem Leistungssport zeigen, dass das RPE bei gleichförmiger Pacing-Strategie unter standardisierten Bedingungen in der Regel bis zum Ziel weitgehend linear ansteigt (Faulkner, Parfitt, & Eston, 2008).

Pacing stützt sich zwar auf (1) dieses Anstrengungsempfinden als Wahrnehmung aktueller Ermüdung, geht aber noch darüber hinaus (Tucker, 2009). Es beinhaltet zudem ...

- (2)... die bewusste Wahl oder unbewusste Präferenz eines gewünschten oder maximal tolerierten Grades an Anstrengung zum Erreichen eines Ziels: „Ich bin heute nicht so motiviert, ich will mich lieber nur moderat anstrengen.“
- (3) ...die Antizipation verbleibender körperlicher Arbeit (Feedforward-Mechanismus): „Ich habe noch zwei Runden im Park vor mir.“
- (4) ...die Einschätzung der jetzigen körperlichen Leistungsfähigkeit: „Die letzten Monate konnte ich viel trainieren, daher sollte meine Ausdauer ziemlich gut sein.“

- (5) ...die Berücksichtigung von Erfahrungen mit der Bewältigung der gleichen oder einer ähnlichen Bewegungsaufgabe: „Momentan (2 von 4 Runden absolviert) fühle ich mich ähnlich stark beansprucht wie bei den letzten Trainingseinheiten, die ich problemlos abschließen konnte.“
- (6)... die Wahl bzw. die Beibehaltung oder Veränderung der momentanen körperlichen Leistung beruhend auf (1) bis (5): „Ich fühle mich jetzt nach der Hälfte meines Trainingslaufs nur leicht beansprucht (Borg 11). Auf Basis meiner bisherigen Erfahrung und der Einschätzung meiner Ausdauer-Leistungsfähigkeit hatte ich das an diesem Punkt so erwartet. Ich werde daher mit demselben Tempo weiterlaufen, so dass ich mich zum Ende des Trainings moderat angestrengt fühlen werde.“

Die tatsächlich erbrachte körperliche Leistung ist also das offensichtliche, objektiv messbare Ergebnis von psychophysiologischen Entscheidungsprozessen, die in den obigen Beispielen zwar verbalisiert wurden, jedoch nicht zwingend bewusst ablaufen. Dies kommt nicht nur im Leistungssport, sondern wie im folgenden Teilkapitel exemplarisch dargestellt im Gesundheitssport und in der Bewegungstherapie zum Tragen.

### **Selbststeuerung körperlichen Trainings in der kardialen Prävention und Rehabilitation**

Körperliche Signale wie Anstrengungsempfinden, Ermüdung oder Schmerzen während akuter Belastung sollten es auch wenig sportlich Erfahrenen und Rehabilitanden ermöglichen, ihre Belastungsintensität so einzuschätzen und gesundheitskompetent zu steuern, dass eine individuell adäquate Beanspruchung erreicht wird. Im Sinne der Subkomponente „Steuerungskompetenz“ der bewegungsbezogenen Gesundheitskompetenz wäre die Beanspruchung dann individuell adäquat, wenn sie

- a) die Optimierung von Gesundheitswirkungen,
- b) die Minimierung von Gesundheitsrisiken, sowie
- c) positive affektive Reaktionen

ermöglicht und sicherstellt, oder zumindest die Wahrscheinlichkeit dafür erhöht (Sudeck & Pfeifer, 2016). Bisherige Empfehlungen für das Training in der kardialen Prävention und Rehabilitation, die sich allgemein mit diesen drei Ausrichtungen beschäftigen, beziehen sich primär auf das Anstrengungsempfinden, das eine elementare Facette eines adäquaten

Pacing-Verhaltens darstellt (siehe oben (1)). Demgegenüber sind die weiteren Elemente des Pacings (siehe oben 2-5) in diesem Kontext bisher kaum systematisch untersucht worden.

### Optimierung von Gesundheitswirkungen

Trainingsinterventionen in der kardialen Rehabilitation verwenden häufig die Dauer- (durchgehende, gleichmäßige Belastung) bei einer Intensität von ca. 40–80% der maximalen aeroben Leistungsfähigkeit und erzielen damit mittlere Verbesserungen der Ausdauer-Leistungsfähigkeit zwischen 13 und 66% innerhalb von 4 bis 26 Wochen (Hansen, Dendale, Berger, & Meeusen, 2005). Empfehlungen des American College of Sports Medicine (ACSM) zufolge sollen sich Patienten mit einer stabilen Herzerkrankung „leicht“ bis „etwas anstrengend“ (Borg-RPE: 11-14) belasten (American College of Sports Medicine, Thompson, Gordon, & Pescatello, 2010).

In der Primärprävention kardialer Erkrankungen führen bei gleichem Gesamtenergieumsatz höhere Intensitäten zu größeren Effekten als niedrige Intensitäten (Thiel, Vogt, & Banzer, 2012). Für die Sekundärprävention fehlen mehrarmige prospektive Studien zur Intensitäts-Wirkungs-Beziehung (Bjarnason-Wehrens et al., 2009b). Trainingseffekte variieren erheblich interindividuell (Timmons, 2011). Welche Individuen und Krankheitskollektive durch Ausdauertraining starke oder schwächere Gesundheitswirkungen erzielen können, ist unklar (Bjarnason-Wehrens et al., 2009b).

Die Effekte eines ausschließlich selbstgesteuerten Trainings auf Therapietreue, Ausdauerleistungsfähigkeit und gesundheitsbezogene Endpunkte sind bislang wenig untersucht. Eine erste randomisierte kontrollierte Studie (Ilarraza, Myers, Kottman, Rickli, & Dubach, 2004) zeigt, dass Herzpatienten nach Herzinfarkt oder Bypass-Operation, die ihre Trainingsintensität auf dem Fahrradergometer völlig selbstständig anhand des RPE festlegten („etwas anstrengend“), in 30 Tagen ihre Leistungsfähigkeit in annähernd ähnlichem mittleren Maße steigern konnten (+23%) wie Patienten, die ihr Training bei gleicher wöchentlicher Dauer (5x30 min Fahrradergometer/Woche und täglich 2x45 min Walken) rein herzfrequenzbasiert (70% HRR: +34%) oder basierend auf Herzfrequenz und Anstrengungsempfinden (60-80% HRR und „etwas anstrengend“: +31%) steuerten (Ilarraza et al., 2004).

## Minimierung von Gesundheitsrisiken

Bewegungstherapie setzt in der Regel ein systematisches Screening des individuellen mit körperlichem Training verbundenen Risikos, sowie gegebenenfalls eine (sport-)medizinische Risikoabklärung voraus. In der kardialen Prävention und Rehabilitation wurden auf Basis langjähriger klinischer Erfahrung und einer Vielzahl von Studien geeignete Adressatengruppen identifiziert, die das Anstrengungsempfinden zur Steuerung des Trainings nutzen können. Gemäß der Leitlinie körperliche Aktivität zur Sekundärprävention und Therapie kardiovaskulärer Erkrankungen der Deutschen Gesellschaft für Prävention und Rehabilitation von Herz-Kreislaufkrankungen, DGPR, ist für Untrainierte der Risikoklasse A (darunter Kinder, Männer unter 45, und Frauen unter 55 Jahren, jeweils ohne Symptome einer Herzerkrankung und ohne Hauptrisikofaktoren) keine Überwachung der Herzfrequenz beim Training erforderlich. Für Patienten der Risikoklasse B (Patienten mit stabiler kardiovaskulärer Erkrankung und niedrigem Risiko für Komplikationen bei größerer körperlicher Belastung) wird eine apparative und ärztliche Überwachung des Trainings nur dann empfohlen, wenn die Erkrankung noch nicht lange bekannt ist und die Einschätzung der Belastbarkeit unsicher erscheint (Bjarnason-Wehrens et al., 2009a).

Die DGPR empfiehlt Patienten der Risikoklasse B, die Borg-Skala nur ergänzend zu anderen Steuerungsmöglichkeiten sowie zur Unterstützung der Schulung eines realistischen Beanspruchungsempfindens einzusetzen (Bjarnason-Wehrens et al., 2009a). Begründet wird dies damit, dass die Borg-Skala als alleinige Steuerungsgröße Störfaktoren unterliegen kann (Fähigkeit zur Selbsteinschätzung und Körperwahrnehmung, Ehrgeiz, Gruppendynamik).

Hingegen empfiehlt das ACSM durchaus, nur die Borg-Skala zu verwenden, sofern keine aktuellen Ergebnisse einer Belastungsergometrie verfügbar sind (American College of Sports Medicine et al., 2010).

Tatsächlich wird in der Versorgungspraxis die Intensität häufig vorwiegend anhand des Anstrengungsempfindens gesteuert. In Australien orientieren sich beispielsweise 80% der kardialen Rehabilitationszentren am Anstrengungsempfinden nach Borg, nur 19% an der Herzfrequenz und/oder an Ergebnissen einer Leistungsdiagnostik (Abell, Glasziou, Briffa, & Hoffmann, 2016).

## Positive affektive Reaktion

Affektive Reaktionen während und nach körperlicher Betätigung werden üblicherweise entlang affektiver Basisdimensionen beschrieben (Schimmack & Grob, 2000). Eine verbreitete konzeptionelle Basis ist das Circumplex-Modell des affektiven Befindens (Ekkekakis, 2008), das eine Dimension der affektiven Valenz (schlechtes vs. gutes Befinden; Unwohlsein vs. Wohlfühlen) und eine davon weitgehend unabhängige Dimension der Aktivierung (wach, hoch aktiviert vs. wenig aktiviert) beinhaltet. Teilweise wird letztere Dimension dahingehend differenziert, ob es sich um positive Aktivierung (z. B. energiegeladener vs. energieloser) oder negative Aktivierung handelt (z. B. unruhig vs. ruhig).

Affektive Reaktionen sind erstmalig durch das ACSM in den 2011 veröffentlichten Trainingsempfehlungen für gesunde Erwachsene aufgenommen worden (Garber et al., 2011). Wesentliches Argument ist hierfür, dass positive affektive Reaktionen (z. B. positive Valenz und hohe positive Aktivierung) mit der Aufrechterhaltung sportlicher Aktivitäten assoziiert sind, wobei insbesondere die affektiven Reaktionen *während* der Aktivität entscheidend sind (Rhodes & Kates, 2015). Zudem werden affektive Reaktionen als sekundäre Methoden der Belastungssteuerung in den Trainingsempfehlungen diskutiert, da auch systematische Beziehungen zu physiologischen Schwellenkonzepten bestehen (Ekkekakis & Acevedo, 2006).

Im Kontext der Belastungssteuerung deuten Studien wiederholt darauf hin, dass selbstgewählte Intensitäten mit positiveren affektiven Reaktionen einhergehen als vorgegebene Belastungsintensitäten - auch wenn die objektiv ermittelte Intensität vergleichbar ist. Eine Erklärung wird u.a. in dem höheren Autonomieerleben der Trainierenden gesehen (Ekkekakis, 2009; Parfitt, Rose, & Burgess, 2006).

## **Erlernen von Pacing zum Erwerb von Steuerungskompetenz**

### Praxis

Steuerungskompetenz geht weit über die Fähigkeit hinaus, mechanistisch bei einem vorgegebenen Anstrengungsempfinden (z.B. „Borg 13“) zu trainieren. Ansätze zur Förderung des Erwerbs von Steuerungskompetenz finden sich beispielsweise in Programmen für Herzsportler (Höner, Sudeck, Keck, & Kosmützky, 2011), in Adipositas-Schulungskonzepten

(Stachow & Flothkötter, 2004), und in Rückenschul-Konzepten (Pfeifer, 2007). Dabei werden insbesondere die Wahrnehmung körperlicher Beanspruchung und die unterschiedlichen Möglichkeiten der Selbststeuerung von Ausdauerbelastungen thematisiert und geschult. Neben Informationen zur Belastungssteuerung (Vorträge, Gespräche in der Gruppe) werden praktische Übungsformen zum Walking und zur Walking-Technik angeboten. Methodisch kann hier zunächst eine intermittierende Belastungsgestaltung erfolgen, von der aus schrittweise die Intervalle verlängert und Pausen verkürzt werden, bis eine Dauerbelastung möglich ist. Typische Elemente für eine Person mit ischämischer Herzkrankheit sind in Tabelle 1 dargestellt.

\*\*\* Tabelle 1 \*\*\*

Wie weiter oben beschrieben erfolgt beim Pacing die Beibehaltung oder Veränderung der Geschwindigkeit oder Leistung unter anderem auf Basis der Antizipation verbleibender Arbeit, der Wahrnehmung von Anstrengung und dem Abgleich dieser Wahrnehmung mit bisherigen Erfahrungen. Diese Komponenten, die gewissermaßen Pacing konstituieren, werden augenscheinlich von erfahrenen Gesundheitssportlern und Patienten, aber auch von Übungsleitern und Therapeuten bereits in vielfältiger Weise genutzt. Zudem werden sie in bestehenden Konzepten implizit und explizit berücksichtigt (Höner et al., 2011; Pfeifer, 2007). Kernelemente eines spezifischen „Pacing-Trainings“ sind Variationen der Trainingsintensität und zum Teil auch der Trainingsdauer, und stellenweise – in einem definierten Rahmen – das Spiel mit Pacing und seinen Konstituenten (Tabelle 2).

\*\*\* Tabelle 2 \*\*\*\*

### Evidenzbasierung

Zur Frage, wie das Erlernen von Pacing tatsächlich bestmöglich gefördert werden kann, existieren aktuell kaum wissenschaftliche Untersuchungen. Unstrittig erscheint, dass die Lenkung von Aufmerksamkeit auf internale (d.h. den eigenen Organismus betreffende) oder externale (d.h. die Umgebung betreffende) Prozesse intensitätsabhängig positive oder negative Einflüsse auf das Anstrengungsempfinden und die Bewegungsökonomie haben

kann (Lind, Welch, & Ekkekakis, 2009; Schücker, Knopf, Strauss, & Hagemann, 2014). Dissoziative Strategien (Versuch der Selbstablenkung, d.h. Focus weg von der Wahrnehmung der Beanspruchung) können bei niedrigen bis moderaten Intensitäten die Wahrnehmung von Anstrengung reduzieren und die affektive Reaktion verbessern. Bei hoher Intensität sind sie aufgrund der Dominanz physiologischer Signale nicht mehr wirksam (Ekkekakis et al., 2011; Lind et al., 2009). Dissoziative Strategien und der Einsatz von Faktoren wie adressatengerechte Musik könnten demnach bei moderater Trainingsintensität genutzt werden, Teilnahmemotivation und Adhärenz günstig zu beeinflussen (Karageorghis, Terry, Lane, Bishop, & Priest, 2012; Lind et al., 2009). Umgekehrt könnten assoziative Strategien (Focus bewusst auf die Wahrnehmung körperlicher Anstrengung lenken) die mit einer zu hohen Intensität verbundenen Risiken vermeiden helfen (Lind et al., 2009). Zudem sollten assoziative Strategien vor allem für die Verbesserung der Selbsteinschätzung der Beanspruchung günstig sein, um darauf aufbauend körperliche Belastungen adäquat selbst steuern zu können.

Erste Befunde zur Frage, welche Populationen ihre Beanspruchung gut einschätzen und Belastungen effektiv steuern können, sind partiell widersprüchlich. Scherr und Kollegen observierten bei einer heterogenen Stichprobe von über 2.500 Personen, dass die Beziehungen zwischen RPE und Herzfrequenz ( $r=0,74$ ) sowie zwischen RPE und Blutlaktatkonzentration ( $r=0,83$ ) nicht systematisch durch Alter, Geschlecht, Vorliegen koronarer Herzkrankheit, Bewegungsverhalten und Modus des Belastungstests beeinflusst wurde (Scherr et al., 2013). Hingegen berichtet eine andere Arbeitsgruppe, dass Frauen ihre Beanspruchung eher über-, regelmäßig Trainierende ihre Beanspruchung eher unterschätzen (Skatrud-Mickelson, Benson, Hannon, & Askew, 2011).

Unabhängig von der gezielten Ansteuerung eines bestimmten Anstrengungsempfindens scheinen Patienten ihre freie Selbstregulation der Belastung intuitiv auf krankheitsspezifische organische und funktionelle Veränderungen abzustimmen. Die Mehrzahl der Patienten mit Herzinsuffizienz wählt ihre Ganggeschwindigkeit so, dass geringe ventilatorische Kosten entstehen (niedriges ventilatorisches Äquivalent für Kohlendioxid), während Gesunde eher eine Minimierung energetischer Kosten anstreben (Figueiredo, Ribeiro, Bona, Peyré-Tartaruga, & Ribeiro, 2013).

Anhand von Pacing bieten sich auch Möglichkeiten, Steuerungskompetenz im Feld messbar und damit einerseits einer Evidenzbasierung besser zugänglich zu machen, sowie

andererseits Trainierenden eine Möglichkeit an die Hand zu geben, ihre Steuerungskompetenz selbst einzuschätzen. Steuerungskompetenz könnte demnach zum Beispiel auf der Verhaltensebene zum Ausdruck kommen als:

- ein frühzeitiges Finden einer individuell adäquaten Geschwindigkeit/Belastungsintensität über eine definierte Distanz;
- ein gleichmäßiges Durchhalten einer hohen Geschwindigkeit über eine definierte Dauer (Beispiel 6 Minuten-Gehtest);
- ein frühzeitiges Erkennen einer individuell nicht adäquaten Intensität (Beispielsweise beim Training mit einer sehr leistungsstarken Gruppe);
- reproduzierbare Wahl einer gewünschten/vorgegebenen Geschwindigkeit/Belastungsintensität unter systematisch variierenden Bedingungen.

### **Nebenwirkungen und Potenziale selbstgesteuerten Trainings im Gesundheitssport**

Wenn Trainierende eine größere Verantwortung für ihre Belastungssteuerung übernehmen, werden sich einige intensiver, andere weniger intensiv als empfohlen belasten. Hier gilt es, vor Trainingsbeginn zu identifizieren, wer Kontraindikationen (Physical Activity Readiness Questionnaire, sportärztliche Untersuchung) oder besonderem Unterstützungsbedarf aufweist (z.B. keinerlei Erfahrung mit sportlichem Training). Letztere müssen vermutlich intensiver aufgeklärt, angeleitet und betreut werden. Bis auf Studien mit sehr kleinen Stichproben, in denen bei selbstgesteuertem Training keine Nebenwirkungen auftraten (Ilarraza et al., 2004), ist unklar, inwieweit die Selbststeuerung das Risiko für Nebenwirkungen verändert. Plausibel wäre sowohl ein erhöhtes als auch ein reduziertes Risiko in Abhängigkeit der Steuerungskompetenz und der jeweiligen Umstände. Das absolute Risiko einer kardialen Komplikation bei körperlichem Training liegt allgemein mit 0,08 bis 0,24 Ereignissen pro 10.000 Trainingsstunden sehr niedrig und ist für Menschen in der ambulanten kardialen Rehabilitation und gesunde Freizeitsportler vergleichbar (Foster & Porcari, 2001). Das relative Risiko eines unmittelbaren kardialen Ereignisses bei körperlichem Training (im Vergleich zu körperlicher Inaktivität) liegt zwischen 2,1 und 56 (Franklin & Billecke, 2012). Am höchsten ist dieses relative Risiko bei körperlich inaktiven Menschen mit einer kardiovaskulären Erkrankung, die eine ungewohnte, hochintensive Belastung durchführen (Foster & Porcari, 2001; Franklin & Billecke, 2012). Hier ist offensichtlich eine

besonders langfristig angelegte, behutsame Steigerung der Trainingsbelastung, und eine besonders sorgfältige Schulung der Belastungssteuerung indiziert.

Unter bestimmten Voraussetzungen wird mittlerweile auch der Einsatz von High Intensity Training (HIT) bei einigen Patientenpopulationen als effektiv und sicher betrachtet (Guiraud et al., 2012; Helgerud et al., 2011). Erste Studien zeigen, dass während oder im unmittelbaren Anschluss an insgesamt 46.000 h überwacht intensives Intervalltraining zwei nicht-letale kardiale Ereignisse (Herzstillstand) auftraten, bei 129.000 h moderaten Trainings eines (Rognmo et al., 2012). Die Datenbasis ist noch unzureichend, um eine gesicherte Aussage über die langfristigen Effekte und Risiken hochintensiven Trainings zu treffen. Sie weist jedoch darauf hin, dass auch eine bei Selbststeuerung möglicherweise häufiger zu beobachtende hohe Trainingsintensität nicht zwangsläufig mit hohen Risiken vergesellschaftet sein muss. Mit Blick auf die affektive Reaktion ist allerdings auch zu bedenken, in welchem Maße höhere Intensitäten insbesondere bei Menschen mit weniger Bewegungserfahrung auch zu negativen Nebenwirkungen auf die Adhärenz einhergehen könnten (Decker & Ekkekakis, 2017).

Folgt man dem hier skizzierten Verständnis von Pacing und Belastungssteuerung, hätte dies auch Auswirkungen auf die Rolle des Monitorings von Belastung und Belastungsresponse. Anstelle einer permanenten Überprüfung, ob auch tatsächlich im angestrebten („richtigen“) Trainingsbereich gearbeitet wird, könnten - wie in den konkreten Vorschlägen oben skizziert – Kennzahlen der Belastung (z.B. Geschwindigkeit) und Beanspruchung (z.B. Herzfrequenz) auch als Feedback zur Schulung der eigenen Wahrnehmung im Rahmen eines Lernprozesses betrachtet werden. Informations- und Kommunikationstechnologien (IKT), welche die direkte Darstellung, Verarbeitung und Kommunikation im Feld registrierter Signale, Indikatoren für Leistung und subjektiven Parametern erlauben (Meißner, 2012), können diesen Lernprozess erleichtern. Dazu gehören Akzelerometrie, Pedometrie, GPS-gestützte Erhebungen, Dynamometrie und fortlaufende Registrierungen der Herzfrequenz, des Anstrengungsempfindens oder des affektiven Befindens. Telemetrische Systeme ermöglichen es Therapeuten und Ärzten, den Pacing-Lernprozess auch über räumliche Distanzen hinweg zu beobachten und zu unterstützen.

Patientenorientierung sowie die Förderung der selbstbestimmten und kompetenten Teilhabe sind zentrale Elemente moderner Ansätze der Rehabilitation. Sie sind gerade bei Patienten eine Herausforderung, die aufgrund körperlicher Dekonditionierung verunsichert

sind und den Umgang mit körperlicher Belastung und deren Einschätzung (wieder) lernen müssen. Befähigt man Patienten schrittweise dazu, ihr Training selbst (mit) zu steuern, werden sie noch mehr zu Co-Produzenten ihrer eigenen Gesundheit und ihres Wohlbefindens. Sie werden zunehmend organisatorisch unabhängiger und können vielfältigere Bewegungsangebote nutzen, was Motivation und Compliance fördern kann.

## **Fazit und Ausblick**

Pacing ist der fundamentale Mechanismus der Regulation körperlicher Leistung. Es beruht auf dem Anstrengungsempfinden, beinhaltet aber darüber hinaus auch die Wahl oder Präferenz eines Anstrengungsgrades, die Antizipation verbleibender körperlicher Arbeit, eine Einschätzung der aktuellen körperlichen Leistungsfähigkeit, die Berücksichtigung bisheriger Erfahrungen, sowie – darauf aufbauend – die Beibehaltung oder Veränderung der momentanen körperlichen Leistung.

Die wissenschaftliche Auseinandersetzung mit Pacing bietet wertvolle Anknüpfungspunkte, um insbesondere bei der Ausdauer-Belastungssteuerung in Gesundheitssport und Bewegungstherapie...

- ...bisherige Konzepte zur Förderung des Subziels „Steuerungskompetenz“ als Komponente der bewegungsbezogenen Gesundheitskompetenz zu untermauern;
- ...entsprechende praktische Förderansätze zu erweitern;
- ...Steuerungskompetenz im Feld messbar zu machen.

Einige damit verbundene Aspekte werden bereits in bewegungstherapeutischen Programmen berücksichtigt und finden sich auch in den Zielformulierungen der Klassifikation therapeutischer Leistungen (KTL, DRV, 2015) wieder. Gleichwohl erscheint das Potenzial einer stärkeren praktischen Berücksichtigung von Pacing-Phänomenen noch ausgesprochen groß. Pacing zur Steigerung der Steuerungskompetenz stellt demnach einen lohnenden Gegenstand gesundheitssportlicher und bewegungstherapeutischer Forschung dar, mit elementarer Bedeutung für die physiologische als auch pädagogisch-psychologische Fundierung von Gesundheitssport und Bewegungstherapie.

Bei der Erforschung zielgruppenspezifischer Möglichkeiten und Grenzen der Selbstregulation körperlich-sportlicher Belastung gilt es, alle drei Zielebenen der Steuerungskompetenz –

Optimierung von Gesundheitswirkungen, Minimierung von Gesundheitsrisiken, und Auslösen positiver affektiver Reaktionen – zu berücksichtigen. Neben Modellen der ermüdungsmedierten Regulation körperlicher Belastung und Analysen von Pacing-Profilen in gesundheitssportlichen Kontexten bieten Untersuchungen zur frei gewählten Geh- und Laufgeschwindigkeit (Ekkekakis, 2009) und zum Zusammenhang zwischen Belastungsintensität und affektivem Befinden (Ekkekakis et al., 2011) Grundlagen und Anregungen für weitere Untersuchungen.

Aktuell wissen wir vergleichsweise wenig darüber, wie die alltägliche Belastungsregulation tatsächlich im Detail vonstattengeht. Ein besseres Verständnis zielgruppenspezifischer physiologischer Steuermechanismen und günstiger Wahrnehmungs- und Lernbedingungen würde es erleichtern, geeignete Populationen für eine Selbststeuerung zu identifizieren, sowie Interventionen zur Verbesserung der Wahrnehmung von Beanspruchung und effektiveren Selbststeuerung von Trainingsbelastungen weiterzuentwickeln (Ekkekakis, 2009). Darauf aufbauend bleibt in kontrollierten Studien zu ermitteln, ob und welche Rückmeldungen zur objektiven Beanspruchung unter variierenden Belastungsbedingungen den Trainierenden Gelegenheit zur optimalen Schulung und Kalibrierung ihrer Steuerungskompetenz geben können.

## **Interessenkonflikte**

Der korrespondierende Autor gibt im Namen aller Autoren an, dass keine Interessenkonflikte bestehen.

## Literaturverzeichnis

- Abbiss, C. R., & Laursen, P. B. (2008). Describing and understanding pacing strategies during athletic competition. *Sports Medicine*, 38(3), 239–252.
- Abell, B., Glasziou, P., Briffa, T., & Hoffmann, T. (2016). Exercise training characteristics in cardiac rehabilitation programmes: a cross-sectional survey of Australian practice. *Open heart*, 3(1), e000374.
- American College of Sports Medicine, Thompson, W. R., Gordon, N. F., & Pescatello, L. S. (2010). *ACSM's guidelines for exercise testing and prescription* (8th ed). Wolters Kluwer Health. Philadelphia: Lippincott Williams & Wilkins.
- Baron, B., Moullan, F., Deruelle, F., & Noakes, T. D. (2011). The role of emotions on pacing strategies and performance in middle and long duration sport events. *British Journal of Sports Medicine*, 45(6), 511–517.
- Bernard, T., Hausswirth, C., Le Meur, Y., Bignet, F., Dorel, S., & Brisswalter, J. (2009). Distribution of power output during the cycling stage of a Triathlon World Cup. *Medicine and Science in Sports and Exercise*, 41(6), 1296–1302.
- Bjarnason-Wehrens, B., Schulz, O., Gielen, S., Halle, M., Dürsch, M., Hambrecht, R., ... (2009a). Leitlinie körperliche Aktivität zur Sekundärprävention und Therapie kardiovaskulärer Erkrankungen. *Clinical Research in Cardiology Supplements*, 4(S3), 1–44.
- Bjarnason-Wehrens, B., Schulz, O., Gielen, S., Halle, M., Dürsch, M., Hambrecht, R., ... (2009b). Leitlinie körperliche Aktivität zur Sekundärprävention und Therapie kardiovaskulärer Erkrankungen. *Clinical Research in Cardiology*, 98(Suppl 3), 1–44.  
Retrieved from  
[http://www.dgpr.de/fileadmin/user\\_upload/DGPR/Leitlinien/LL\\_Koerperliche\\_Aktivitaet\\_CRCS078.PDF](http://www.dgpr.de/fileadmin/user_upload/DGPR/Leitlinien/LL_Koerperliche_Aktivitaet_CRCS078.PDF)
- Borg, G. (1970). Perceived exertion as an indicator of somatic stress. *Scandinavian Journal of Rehabilitation Medicine*, 2(2), 92–98.
- Burschka, J. M., Keune, P. M., Menge, U., Hofstadt-van Oy, U., Oschmann, P., & Hoos, O. (2012). An exploration of impaired walking dynamics and fatigue in multiple sclerosis. *BMC neurology*, 12, 161.
- Castro, A. A. M., Porto, E. F., Iamonti, V. C., Souza, G. F. de, Nascimento, O. A., & Jardim, J. R. (2013). Oxygen and ventilatory output during several activities of daily living performed by COPD patients stratified according to disease severity. *PloS one*, 8(11), e79727.
- Davis, J. M., & Bailey, S. P. (1997). Possible mechanisms of central nervous system fatigue during exercise. *Medicine and Science in Sports and Exercise*, 29(1), 45–57.
- Decker, E. S., & Ekkekakis, P. (2017). More efficient, perhaps, but at what price?: Pleasure and enjoyment responses to high-intensity interval exercise in low-active women with obesity. *Psychology of Sport and Exercise*, 28, 1–10.

- Deutsche Rentenversicherung (2016). *Reha-Therapiestandards Koronare Herzkrankheit: für die medizinische Rehabilitation der Rentenversicherung*. Retrieved from [http://www.deutsche-rentenversicherung.de/Allgemein/de/Inhalt/3\\_Infos\\_fuer\\_Experten/01\\_sozialmedizin\\_forschung/downloads/quali\\_rehatherapiestandards/KHK/rts\\_khk\\_download.html](http://www.deutsche-rentenversicherung.de/Allgemein/de/Inhalt/3_Infos_fuer_Experten/01_sozialmedizin_forschung/downloads/quali_rehatherapiestandards/KHK/rts_khk_download.html)
- Edwards, A. M., & Polman, R. C. J. (2013). Pacing and awareness: brain regulation of physical activity. *Sports Medicine*, *43*(11), 1057–1064.
- Ekkekakis, P. (2008). Affect circumplex redux: The discussion on its utility as a measurement framework in exercise psychology continues. *International Review of Sport and Exercise Psychology*, *1*(2), 139–159.
- Ekkekakis, P. (2009). Let them roam free? Physiological and psychological evidence for the potential of self-selected exercise intensity in public health. *Sports Medicine*, *39*(10), 857–888.
- Ekkekakis, P., & Acevedo, E. O. (2006). Affective responses to acute exercise: toward a psychobiological dose-response model. In E. O. Acevedo & P. Ekkekakis (Eds.), *Psychobiology of physical activity* (pp. 91–109). Champaign, Ill.: Human Kinetics.
- Ekkekakis, P., Parfitt, G., & Petruzzello, S. J. (2011). The pleasure and displeasure people feel when they exercise at different intensities: decennial update and progress towards a tripartite rationale for exercise intensity prescription. *Sports Medicine*, *41*(8), 641–671.
- Enoka, R. M., & Duchateau, J. (2008). Muscle fatigue: what, why and how it influences muscle function. *The Journal of Physiology*, *586*(1), 11–23.
- Faulkner, J., Parfitt, G., & Eston, R. (2008). The rating of perceived exertion during competitive running scales with time. *Psychophysiology*, *45*(6), 977–985.
- Figueiredo, P., Ribeiro, P. A. B., Bona, R. L., Peyré-Tartaruga, L. A., & Ribeiro, J. P. (2013). Ventilatory determinants of self-selected walking speed in chronic heart failure. *Medicine and Science in Sports and Exercise*, *45*(3), 415–419.
- Foster, C., & Porcari, J. P. (2001). The risks of exercise training. *Journal of Cardiopulmonary Rehabilitation*, *21*(6), 347–352.
- Franklin, B. A., & Billecke, S. (2012). Putting the benefits and risks of aerobic exercise in perspective. *Current sports medicine reports*, *11*(4), 201–208.
- Garber, C. E., Blissmer, B., Deschenes, M. R., Franklin, B. A., Lamonte, M. J., Lee, I.-M., ... (2011). American College of Sports Medicine position stand. Quantity and quality of exercise for developing and maintaining cardiorespiratory, musculoskeletal, and neuromotor fitness in apparently healthy adults: guidance for prescribing exercise. *Medicine and science in sports and exercise*, *43*(7), 1334–1359.
- Guiraud, T., Nigam, A., Gremeaux, V., Meyer, P., Juneau, M., & Bosquet, L. (2012). High-intensity interval training in cardiac rehabilitation. *Sports Medicine*, *42*(7), 587–605.
- Hansen, D., Dendale, P., Berger, J., & Meeusen, R. (2005). Rehabilitation in cardiac patients: what do we know about training modalities? *Sports medicine (Auckland, N.Z.)*, *35*(12), 1063–1084.

- Helgerud, J., Karlsen, T., Kim, W. Y., Høydal, K. L., Støylen, A., Pedersen, H., ... (2011). Interval and strength training in CAD patients. *International journal of sports medicine*, 32(1), 54–59.
- Höner, O., Sudeck, G., Keck, M., & Kosmützky, G. (2011). Verhaltensbezogene Interventionen in der Sport- und Bewegungstherapie. *Bewegungstherapie & Gesundheitssport*, 27(3), 111–120.
- Ilarraza, H., Myers, J., Kottman, W., Rickli, H., & Dubach, P. (2004). An evaluation of training responses using self-regulation in a residential rehabilitation program. *Journal of Cardiopulmonary Rehabilitation*, 24(1), 27–33.
- Jones, H. S., Williams, E. L., Bridge, C. A., Marchant, D., Midgley, A. W., Micklewright, D., & Mc Naughton, L. R. (2013). Physiological and psychological effects of deception on pacing strategy and performance: a review. *Sports Medicine*, 43(12), 1243–1257.
- Joseph, T., Johnson, B., Battista, R. A., Wright, G., Dodge, C., Porcari, J. P., ... (2008). Perception of fatigue during simulated competition. *Medicine and Science in Sports and Exercise*, 40(2), 381–386.
- Karageorghis, C. I., Terry, P. C., Lane, A. M., Bishop, D. T., & Priest, D.-I. (2012). The BASES Expert Statement on use of music in exercise. *Journal of Sports Sciences*, 30(9), 953–956.
- Knicker, A. J., Renshaw, I., Oldham, A. R. H., & Cairns, S. P. (2011). Interactive processes link the multiple symptoms of fatigue in sport competition. *Sports Medicine*, 41(4), 307–328.
- Le Meur, Y., Hausswirth, C., Dorel, S., Bignet, F., Brisswalter, J., & Bernard, T. (2009). Influence of gender on pacing adopted by elite triathletes during a competition. *European Journal of Applied Physiology*, 106(4), 535–545.
- Lind, E., Welch, A. S., & Ekkekakis, P. (2009). Do 'mind over muscle' strategies work? Examining the effects of attentional association and dissociation on exertional, affective and physiological responses to exercise. *Sports Medicine*, 39(9), 743–764.
- March, D. S., Vanderburgh, P. M., Titlebaum, P. J., & Hoops, M. L. (2011). Age, sex, and finish time as determinants of pacing in the marathon. *Journal of Strength and Conditioning Research*, 25(2), 386–391.
- Meißner, F. (2012). Telematik im Gesundheitswesen: Von der Integrierten Versorgung bis zum Facebook für Kranke. *Bewegungstherapie & Gesundheitssport*, 28(4), 154–159.
- Parfitt, G., Rose, E. A., & Burgess, W. M. (2006). The psychological and physiological responses of sedentary individuals to prescribed and preferred intensity exercise. *British journal of health psychology*, 11(Pt 1), 39–53.
- Pfeifer, K. (2007). *Rückengesundheit: Grundlagen und Module zur Planung von Kursen*. Köln: Deutscher Ärzte-Verlag.
- Rhodes, R. E., & Kates, A. (2015). Can the Affective Response to Exercise Predict Future Motives and Physical Activity Behavior? A Systematic Review of Published Evidence. *Annals of behavioral medicine : a publication of the Society of Behavioral Medicine*, 49(5), 715–731.

- Roelands, B., de Koning, J. J., Foster, C., Hettinga, F., & Meeusen, R. (2013). Neurophysiological determinants of theoretical concepts and mechanisms involved in pacing. *Sports Medicine*, *43*(5), 301–311.
- Rognmo, Ø., Moholdt, T., Bakken, H., Hole, T., Mølsted, P., Myhr, N. E., ... (2012). Cardiovascular risk of high- versus moderate-intensity aerobic exercise in coronary heart disease patients. *Circulation*, *126*(12), 1436–1440.
- Scherr, J., Wolfarth, B., Christle, J. W., Pressler, A., Wagenpfeil, S., & Halle, M. (2013). Associations between Borg's rating of perceived exertion and physiological measures of exercise intensity. *European Journal of Applied Physiology*, *113*(1), 147–155.
- Schimmack, U., & Grob, A. (2000). Dimensional models of core affect: A quantitative comparison by means of structural equation modeling. *European Journal of Personality*, *14*(4), 325–345.
- Schücker, L., Knopf, C., Strauss, B., & Hagemann, N. (2014). An internal focus of attention is not always as bad as its reputation: how specific aspects of internally focused attention do not hinder running efficiency. *Journal of Sport & Exercise Psychology*, *36*(3), 233–243.
- Skatrud-Mickelson, M., Benson, J., Hannon, J. C., & Askew, E. W. (2011). A comparison of subjective and objective measures of physical exertion. *Journal of Sports Sciences*, *29*(15), 1635–1644.
- Smits, B. L. M., Pepping, G.-J., & Hettinga, F. J. (2014). Pacing and Decision Making in Sport and Exercise: The Roles of Perception and Action in the Regulation of Exercise Intensity. *Sports Medicine*, *44*(6), 763–775.
- St Clair Gibson, A., de Koning, J. J., Thompson, K. G., Roberts, W. O., Micklewright, D., Raglin, J., & Foster, C. (2013). Crawling to the finish line: why do endurance runners collapse? Implications for understanding of mechanisms underlying pacing and fatigue. *Sports Medicine*, *43*(6), 413–424.
- St Clair Gibson, A., Lambert, E. V., Rauch, L. H. G., Tucker, R., Baden, D. A., Foster, C., & Noakes, T. D. (2006). The role of information processing between the brain and peripheral physiological systems in pacing and perception of effort. *Sports Medicine*, *36*(8), 705–722.
- Stachow, R., & Flothkötter, M. (2004). *Trainermanual leichter, aktiver, gesünder: Interdisziplinäres Konzept für die Schulung übergewichtiger oder adipöser Kinder und Jugendlicher*. AID / hrsg. vom AID-Infodienst Verbraucherschutz, Ernährung, Landwirtschaft e.V.: Vol. 3842. Bonn: Aid-Infodienst Verbraucherschutz, Ernährung, Landwirtschaft.
- Sudeck, G., & Pfeifer, K. (2016). Physical Activity-related Health Competence as an Integrative Objective in Exercise Therapy and Health Sports: Conception and Validation of a Short Questionnaire. *Sportwissenschaft*, *46*(2) 74–87.
- Thiel, C., de Koning, J., & Foster, C. (2015). Potenzielle Einflussfaktoren auf Pacing im ausdauersportlichen Wettkampf. *Sportwissenschaft*, *45*(4), 173–189.

- Thiel, C., Foster, C., Banzer, W., & de Koning, J. J. (2012). Pacing in Olympic track races: Competitive tactics versus best performance strategy. *Journal of Sports Sciences, 30*(11), 1107–1115.
- Thiel, C., Vogt, L., & Banzer, W. (2012). Narrative Übersicht zur Bewegungsdosis in Prävention und Therapie. *Bewegungstherapie & Gesundheitssport, 28*(1), 43–46.
- Timmons, J. A. (2011). Variability in training-induced skeletal muscle adaptation. *Journal of Applied Physiology, 110*(3), 846–853.
- Tucker, R. (2009). The anticipatory regulation of performance: the physiological basis for pacing strategies and the development of a perception-based model for exercise performance. *British Journal of Sports Medicine, 43*(6), 392–400.
- Tucker, R., Lambert, M. I., & Noakes, T. D. (2006). An analysis of pacing strategies during men's world-record performances in track athletics. *International Journal of Sports Physiology and Performance, 1*(3), 233–245.
- Ulmer, H. V. (1996). Concept of an extracellular regulation of muscular metabolic rate during heavy exercise in humans by psychophysiological feedback. *Experientia, 52*(5), 416–420.
- Weir, J. P., Beck, T. W., Cramer, J. T., & Housh, T. J. (2006). Is fatigue all in your head? A critical review of the central governor model. *British Journal of Sports Medicine, 40*(7), 573-86.

*Tabelle 1:* Typische Elemente von Ansätzen zur Förderung des Erwerbs von Steuerungskompetenz

- allgemeine Informationen zu effektiven und sicheren Belastungsintensitäten und -umfängen des Ausdauertrainings
- theoretische Vermittlung und sukzessive praktische Übung, wie sich die Belastungsintensität steuern lässt:
  - anhand der Atmung/mittels Sprechtest (Talk-Test): Teilnehmer sollten sich bei der Belastung noch einigermaßen gut unterhalten können.
  - mit einem Herzfrequenzmessgerät, sofern die Medikation dies zulässt: bei 40-60% der Herzfrequenzreserve (Karvonen-Formel)
  - anhand des subjektiven Anstrengungsempfindens (Borg-Skala): Häufig wird Borg 11-14 angestrebt
  - unter Berücksichtigung subjektiver Anzeichen einer hohen Beanspruchung (z.B. beeinträchtigte Koordination)
  - anhand strukturierter Erfassung des affektiven Befindens (z. B. mit der Feeling Scale (Hardy & Rejeski, 1989) bzw. deren deutsche Fassung (Maibach, Niederberger, Sudeck, & Kopp))
- Kennenlernen grundlegender Pacing-Strategien
  - Anstreben einer gleichförmigen Leistung (Geschwindigkeit oder Wattleistung)
  - Im Zweifel negative Pacing-Strategie anstreben (etwas langsamerer Start, dann schrittweise Steigerung der Intensität im Verlauf der Trainingseinheit)
- Durchführung einfacher Ausdaueraktivitäten in sicheren Intensitätsbereichen mit Unterstützung durch den Therapeuten und Monitoring objektiver Parameter
- Selbständige Kontrolle und Dokumentation des Trainings

*Tabelle 2: Kernelemente eines spezifischen Trainings zur Förderung des Erlernens von Pacing*

- Festigung und Vertiefung der Feedback- und Feedforward Komponenten von Pacing
  - Einschätzen der momentanen Leistung (Geschwindigkeit oder Wattleistung) ohne externe Hinweise – wer schätzt am besten?
  - Einschätzen der eigenen Herzfrequenz ohne Blick auf den Herzfrequenzmonitor – wer ist am nächsten dran?
  - Frühzeitige Einschätzung des resultierenden Anstrengungsempfindens am Ende des Trainings bei Beibehaltung der eingangs selbst gewählten oder vorgegebenen Intensität
  - Frühzeitige Einschätzung der Strecke/Zeit, die eine bestimmte Intensität ohne übermäßige Beanspruchung durchgehalten werden kann.
- Sicherung der Verknüpfung mit objektiven Informationen und zunehmende Variation
  - Variation des Feedbacks: Pacing ohne Anzeige der Herzfrequenz, ohne unmittelbare Therapeutenunterstützung
  - Variation der Aktivitäten: Pacing beim Walken vs. Pacing auf dem Fahrradergometer
  - Geringfügige Variation der Umgebungsbedingungen: Leicht bergauf walken, bei etwas abweichenden Außentemperaturen trainieren
- Stark variierende oder erschwerte Bedingungen
  - Training mit unterschiedlich leistungsstarken Personen/ in der Gruppe. Patienten/Klienten sollen frühzeitig ein für sie zu hohes/zu niedriges Tempo der Trainingspartner erkennen und ihr eigenes Tempo wählen, oder frühzeitig eine Anpassung der Trainingsdauer einplanen.
  - Training mit aktivierend oder beruhigend/entspannend wirkender Musik
  - Erleben der physiologischen und affektiven Reaktionen auf Pacing-Varianten (positiv, gleichförmig, negativ).
  - Erproben der unmittelbaren Effekte von Belastungen unter- und oberhalb

konventioneller Trainingsbereiche - für einen begrenzten Zeitraum.

- Erproben der unmittelbaren Effekte deutlich länger andauernder Belastungen

Während des Erlernens von Pacing sollten Teilnehmer sorgfältig über das Wesen dieses Trainings und dementsprechend ihre Rolle und Eigenverantwortung aufgeklärt werden. Trainer und Therapeuten sollten jederzeit sorgfältig abwägen und, sofern nötig, abklären inwieweit jeder einzelne Teilnehmer adäquat vorbereitet ist, und inwieweit die Nutzung eines bestimmten Trainingselements keine unnötigen Risiken mit sich bringt, bzw. medizinisch indiziert ist.
